# Supplementary material for: The impact of gut microbiota manipulation with antibiotics on colon tumorigenesis in a murine model
Source: PLOS journal article supplement (doi:10.1371/journal.pone.0226907), 2019-12-20
Supplement: S1 (10.1371/journal.pone.0226907.s001) [file journal.pone.0226907.s001]

**S1 Table. Scoring system for determining humane endpoint**

| Score | Body weight   | Hair coat                        | Eye and nose                                              | Activity                                        | Posture                    |
|-------|---------------|----------------------------------|-----------------------------------------------------------|-------------------------------------------------|----------------------------|
| 0     | Normal        | Normal                           | Normal                                                    | Normal                                          | Normal                     |
| 1     | 10% reduction | Coarse hair                      | Half-closed eyes                                          | Reduced activity<br>Reduced response to stimuli | Bent posture               |
| 2     | 20% reduction | Hair loss<br>Inadequate grooming | Closed eyes<br>Periorbital swelling<br>Porphyrin staining | No response to stimuli                          | Unable to hold the head up |
| 3     | 30% reduction |                                  |                                                           |                                                 | Lying on the floor         |

The humane endpoint was determined to have a total score of the sum of each item  $\geq 8$ , or the highest points in two or more of the individual items.
